# Supplementary material
Source: HighWire-hosted journal article supplement (http://cmajopen.ca/highwire/filestream/81114/field_highwire_adjunct_files/1/2018-0072-2-at.pdf)
Supplement: 2018-0072-2-at.pdf [file 2018-0072-2-at.pdf]

**Appendix 2:** Factors associated with an imbalance in risk adjustment

|                              | Proportion of patients | Observed mortality | CIHI predicted mortality | CIHI ratio observed to predicted | STS predicted mortality | STS ratio observed to predicted |
|------------------------------|------------------------|--------------------|--------------------------|----------------------------------|-------------------------|---------------------------------|
| New York Heart Association   |                        |                    |                          |                                  |                         |                                 |
| Class I-III                  | 89.4%                  | 1.37%              | 0.88%                    | 1.56                             | 1.62%                   | 0.85                            |
| Class IV                     | 10.6%                  | 6.89%              | 2.24%                    | 3.03                             | 5.69%                   | 1.20                            |
| Congestive heart failure     |                        |                    |                          |                                  |                         |                                 |
| No                           | 82.2%                  | 1.41%              | 0.89%                    | 1.59                             | 1.54%                   | 0.92                            |
| Yes                          | 17.8%                  | 4.33%              | 1.73%                    | 2.50                             | 4.66%                   | 0.93                            |
| Ejection fraction            |                        |                    |                          |                                  |                         |                                 |
| ≥60%                         | 57.2%                  | 1.21%              | 0.86%                    | 1.41                             | 1.59%                   | 0.76                            |
| 40-59%                       | 31.4%                  | 2.00%              | 1.00%                    | 2.00                             | 1.89%                   | 1.05                            |
| <40%                         | 11.4%                  | 5.53%              | 1.76%                    | 3.13                             | 4.77%                   | 1.16                            |
| Atrial fibrillation          |                        |                    |                          |                                  |                         |                                 |
| No                           | 94.5%                  | 1.74%              | 0.82%                    | 2.13                             | 1.74%                   | 1.00                            |
| Yes                          | 5.5%                   | 5.41%              | 1.88%                    | 2.86                             | 3.49%                   | 1.54                            |
| Acute coronary insufficiency |                        |                    |                          |                                  |                         |                                 |
| No                           | 76.0%                  | 1.20%              | 0.67%                    | 1.79                             | 1.32%                   | 0.91                            |
| Yes                          | 24.0%                  | 4.43%              | 1.55%                    | 2.86                             | 3.37%                   | 1.32                            |
| Cardiac compromise*          |                        |                    |                          |                                  |                         |                                 |
| No                           | 96.0%                  | 1.46%              | 0.94%                    | 1.56                             | 1.73%                   | 0.85                            |
| Yes                          | 4.0%                   | 13.85%             | 2.98%                    | 4.55                             | 9.90%                   | 1.41                            |
| Creatinine                   |                        |                    |                          |                                  |                         |                                 |

|                |       |       |       |      |       |      |
|----------------|-------|-------|-------|------|-------|------|
| <100 mg/dl     | 72.4% | 1.53% | 0.92% | 1.67 | 1.64% | 0.93 |
| ≥100-149 mg/dl | 21.8% | 3.30% | 1.33% | 2.50 | 2.69% | 1.22 |
| ≥150 mg/dl     | 5.8%  | 4.55% | 1.42% | 3.23 | 4.67% | 0.97 |

\*Salvage procedure (resuscitation/circulatory support) (2.1%), cardiogenic shock (0.6%), pre-procedure intra-aortic balloon pump (3.2%) or myocardial infarction within 24 hours of procedure (1.0%).
